# Supplementary material
Source: PubMed Central journal article supplement (PMC5916007)

## **Online Supplement:**

Included in the Supplement are

- Supplemental methods text
- Supplemental results text
- Supplemental Table 1-5
- Supplemental Figure 1

### **Methods**

There were 10 imputed data sets generated from a model with 68 variables using random forest imputation with 500 trees for missing continuous and unordered categorical data, and polytomous logistic regression for missing ordered categorical data. These methods restricted the imputed data to take plausible values found within the original data. Standard combining rules were used to provide p-values and 95% confidence intervals (95%CI) for the estimates of the HR and OR in a way that accounted for the increased uncertainty due to missing data. The fraction of missing information (fmi), reported for each variable in Supplemental tables 1 and 3, represented the impact the missing data have on the estimation of HR and OR. Univariate models and a full multivariate model containing all variables of interest were fit. The CPH and logistic regression models were fit on each of the 10 imputed data sets and standard multiple imputation combining rules were used to compute estimates of the hazard ratio (HR) for OS from CPH models and odds ratio (OR) for response from logistic regression models.

## Results

The anti-CD33 antibody drug conjugate gemtuzumab ozogamicin (GO) was most commonly administered concurrently with HMA (12% of patients). The histone deacetylase inhibitor valproic acid (VPA) was administered either alone or in combination with all-trans retinoic acid (ATRA) in 1.3% and 4.5% of patients, respectively. Hydroxyurea and chemotherapy was added to HMA in 2.3% and 1.2% of patients, respectively. Tyrosine kinase inhibitor (TKI) such as sorafenib, hedgehog inhibitors and isocitrate dehydrogenase (IDH) inhibitors were combined with HMA in 3.5% of patients. Finally, 15 patients received growth factor support in the addition to HMA either erythropoiesis-stimulating agents (ESAs, 1.3%) or granulocyte colony-stimulating factor (G-CSF, 1.5%). During the observation period, 98.5% of patients stopped HMA therapy, mostly due to progressive disease or lack of response while only 6.3% of patients stopped therapy because of HMA-related toxicities.

## Supplemental Table 1: Univariate Logistic Regression Models for Response (CR or CRi).

| Variable                                                                   | Predictive Factor |                         |        |
|----------------------------------------------------------------------------|-------------------|-------------------------|--------|
|                                                                            | p-value           | OR (95% CI)             | fmi    |
| <b>Patient Demographics and HMA therapy</b>                                |                   |                         |        |
| Sex (Female vs. Male)                                                      | 0.7405            | 1.0741 (0.703, 1.6412)  | 0.0326 |
| Age at diagnosis (years)                                                   | 0.6616            | 1.0036 (0.9874, 1.0201) | 0.0367 |
| Age (> 55 vs. ≤ 55)                                                        | 0.3691            | 1.2605 (0.76, 2.0907)   | 0.0312 |
| HMA Therapy (Decitabine vs. Azacitidine)                                   | 0.6039            | 1.1249 (0.7202, 1.7569) | 0.1324 |
| <b>HMA treatment schedule: Decitabine 10-days (Yes vs. No)</b>             | 0.043             | 1.9716 (1.0218, 3.8042) | 0.0203 |
| <b>Clinical parameters prior to initiation of HMA</b>                      |                   |                         |        |
| WHO type at diagnosis (4 categories)                                       |                   |                         |        |
| AML with recurrent genetic abnormalities vs. AML with MDS-related features | 0.0927            | 2.0851 (0.8849, 4.9132) | 0.0562 |
| AML not otherwise specified vs. AML with MDS-related features              | 0.457             | 1.2065 (0.7352, 1.98)   | 0.0103 |
| Therapy-related AML vs. AML with MDS-related features                      | 0.3669            | 0.6263 (0.2264, 1.7328) | 0.0239 |
| Therapy-related AML (Yes vs. No)                                           | 0.1839            | 0.5247 (0.2025, 1.3597) | 0.0268 |
| Treatment related at diagnosis (Yes vs. No)                                | 0.6866            | 0.8716 (0.4464, 1.7018) | 0.0971 |
| Therapy prior to HMA (Relapsed AML vs. Refractory AML)                     | 0.0586            | 1.5175 (0.9848, 2.3382) | 0.0215 |
| Allogeneic SCT prior to initiation of HMA (Yes vs. No)                     | 0.0639            | 1.6035 (0.973, 2.6428)  | 0.0582 |
| Duration of CR1 (months)                                                   | 0.102             | 1.0101 (0.998, 1.0224)  | 0.0432 |
| <b>Duration of CR1 (&gt; 6 vs. ≤ 6 months)</b>                             | 0.0063            | 1.8111 (1.1831, 2.7724) | 0.0156 |
| ECOG status at diagnosis (2 or 3 vs. 0 or 1)                               | 0.8263            | 0.9199 (0.4197, 2.0164) | 0.6842 |
| Number of prior lines of therapy before initiation of HMA                  | 0.2114            | 0.8583 (0.6751, 1.091)  | 0.0489 |
| Number of prior lines of therapy before initiation of HMA (3 categories)   |                   |                         |        |
| 2 Prior Lines vs. 1 Prior Line                                             | 0.0563            | 0.583 (0.335, 1.0147)   | 0.0802 |
| 3 or More Prior Lines vs. 1 Prior Line                                     | 0.5049            | 0.8226 (0.4628, 1.4621) | 0.0576 |
| <b>Laboratory parameters at initiation of HMA</b>                          |                   |                         |        |
| WBC (x 10 <sup>9</sup> cells per liter)                                    | 0.2822            | 0.9892 (0.9697, 1.0091) | 0.3179 |
| WBC (x 10 <sup>9</sup> cells per liter) (> 10 vs. ≤ 10)                    | 0.2599            | 0.682 (0.3483, 1.3355)  | 0.346  |
| <b>Peripheral blast (%)</b>                                                | 0.0212            | 0.9879 (0.9778, 0.9981) | 0.3279 |
| <b>Peripheral blast (≤ 5% vs. &gt; 5%)</b>                                 | 0.0042            | 2.0074 (1.2500, 3.2239) | 0.2179 |
| Bone marrow cellularity (%)                                                | 0.7807            | 0.9989 (0.9911, 1.0068) | 0.3173 |
| Bone marrow cellularity (> 20% vs. ≤ 20%)                                  | 0.4592            | 1.2345 (0.7028, 2.1685) | 0.3131 |
| Bone marrow blast (%)                                                      | 0.7457            | 0.9983 (0.9879, 1.0088) | 0.4199 |
| Bone marrow blast (> 20% vs. ≤ 20%)                                        | 0.1668            | 0.7267 (0.462, 1.1431)  | 0.0232 |
| Cytogenetic risk group (3 categories)                                      |                   |                         |        |
| Intermediate/Normal vs. Poor                                               | 0.6356            | 1.1823 (0.5823, 2.4007) | 0.4646 |
| Good vs. Poor                                                              | 0.284             | 1.4782 (0.7158, 3.0528) | 0.4267 |
| Complex cytogenetics (Yes vs. No)                                          | 0.5212            | 0.7928 (0.383, 1.6409)  | 0.5085 |
| Chromosome 7 abnormality (Yes vs. No)                                      | 0.607             | 0.8503 (0.4554, 1.5877) | 0.3088 |
| Chromosome 5 abnormality (Yes vs. No)                                      | 0.4712            | 0.7633 (0.3613, 1.6126) | 0.4318 |
| Platelet Count (x 10 <sup>9</sup> cells per liter)                         | 0.0879            | 1.0024 (0.9996, 1.0051) | 0.2528 |
| Platelet Count (x 10 <sup>9</sup> cells per liter) (≤ 30 vs. > 30)         | 0.1184            | 0.623 (0.3424, 1.1337)  | 0.4446 |
| <b>Mutational Status prior to initiation of HMA</b>                        |                   |                         |        |
| TP53 mutation (Yes vs. No)                                                 | 0.8405            | 1.1193 (0.3647, 3.4351) | 0.4467 |
| FLT3 mutation (Yes vs. No)                                                 | 0.6132            | 1.1862 (0.6013, 2.3398) | 0.5053 |
| NPM1 mutation (Yes vs. No)                                                 | 0.5901            | 1.1624 (0.6671, 2.0257) | 0.3651 |
| CEBPa mutation (Yes vs. No)                                                | 0.7501            | 1.2279 (0.3333, 4.5234) | 0.5474 |

**Supplemental Table 2: Multivariate Regression Model for Response (CR or CRi).**

| Variable                                                                 | Predictive Factor |                         |        |
|--------------------------------------------------------------------------|-------------------|-------------------------|--------|
|                                                                          | p-value           | OR (95% CI)             | fmi    |
| <b><u>Patient Demographics and HMA therapy</u></b>                       |                   |                         |        |
| Sex (Female vs. Male)                                                    | 0.6575            | 1.1099 (0.6995, 1.7609) | 0.0517 |
| Age (> 55 vs. ≤ 55)                                                      | 0.3826            | 1.3165 (0.7095, 2.443)  | 0.0659 |
| HMA Therapy (Decitabine vs. Azacitidine)                                 | 0.5856            | 1.2001 (0.6179, 2.3311) | 0.3372 |
| <b>HMA treatment schedule: Decitabine 10-days (Yes vs. No)</b>           | 0.0374            | 2.3667 (1.0516, 5.3265) | 0.0587 |
| <b><u>Clinical parameters prior to initiation of HMA</u></b>             |                   |                         |        |
| Therapy-related AML (Yes vs. No)                                         | 0.1524            | 0.4309 (0.1359, 1.3663) | 0.0468 |
| Treatment related at diagnosis (Yes vs. No)                              | 0.5864            | 1.263 (0.5433, 2.9358)  | 0.1265 |
| Therapy prior to HMA (Relapsed AML vs. Refractory AML)                   | 0.8322            | 1.0674 (0.583, 1.9544)  | 0.0617 |
| Allogeneic SCT prior to initiation of HMA (Yes vs. No)                   | 0.1424            | 1.6396 (0.8456, 3.1788) | 0.1797 |
| Duration of CR1 (> 6 vs. ≤ 6 months)                                     | 0.3301            | 1.3519 (0.7362, 2.4825) | 0.0684 |
| ECOG status at diagnosis (2 or 3 vs. 0 or 1)                             | 0.746             | 0.8561 (0.3165, 2.3155) | 0.7232 |
| Number of prior lines of therapy before initiation of HMA (3 categories) |                   |                         |        |
| <b>2 Prior Lines vs. 1 Prior Line</b>                                    | 0.0467            | 0.5175 (0.2704, 0.9905) | 0.1343 |
| 3 or More Prior Lines vs. 1 Prior Line                                   | 0.3383            | 0.7005 (0.3374, 1.4545) | 0.1404 |
| <b><u>Laboratory parameters at initiation of HMA</u></b>                 |                   |                         |        |
| WBC (x 10 <sup>9</sup> cells per liter) (> 10 vs. ≤ 10)                  | 0.6346            | 0.8386 (0.4015, 1.7517) | 0.3718 |
| <b>Peripheral blast (≤ 5% vs. &gt; 5%)</b>                               | 0.0278            | 1.8694 (1.0724, 3.2589) | 0.2947 |
| Bone marrow cellularity (> 20% vs. ≤ 20%)                                | 0.3911            | 1.2991 (0.7105, 2.3756) | 0.3073 |
| Bone marrow blast (> 20% vs. ≤ 20%)                                      | 0.5056            | 0.8375 (0.4965, 1.4127) | 0.0598 |
| Cytogenetic risk group (3 categories)                                    |                   |                         |        |
| Intermediate/Normal vs. Poor                                             | 0.7702            | 0.8849 (0.3816, 2.052)  | 0.48   |
| Good vs. Poor                                                            | 0.3602            | 1.4945 (0.6208, 3.5975) | 0.4884 |
| Complex cytogenetics (Yes vs. No)                                        | 0.5964            | 0.7974 (0.336, 1.8927)  | 0.5578 |
| Chromosome 7 abnormality (Yes vs. No)                                    | 0.8231            | 0.9173 (0.4234, 1.9874) | 0.4394 |
| Chromosome 5 abnormality (Yes vs. No)                                    | 0.5754            | 0.7635 (0.2873, 2.0289) | 0.5845 |
| Platelet Count (x 10 <sup>9</sup> cells per liter) (≤ 30 vs. > 30)       | 0.4332            | 0.7648 (0.3849, 1.5197) | 0.5093 |
| <b><u>Mutational Status prior to initiation of HMA</u></b>               |                   |                         |        |
| TP53 mutation (Yes vs. No)                                               | 0.8015            | 1.1625 (0.3503, 3.858)  | 0.4455 |
| FLT3 mutation (Yes vs. No)                                               | 0.4515            | 1.326 (0.6235, 2.8199)  | 0.5364 |
| NPM1 mutation (Yes vs. No)                                               | 0.7409            | 1.1083 (0.5959, 2.0613) | 0.408  |
| CEBPa mutation (Yes vs. No)                                              | 0.7647            | 1.2138 (0.3303, 4.461)  | 0.4873 |

**Supplemental Table 3: Univariate Cox Proportional Hazards Models for overall survival.**

| Variable                                                                    | Predictive Factor |                         |        |
|-----------------------------------------------------------------------------|-------------------|-------------------------|--------|
|                                                                             | p-value           | HR (95% CI)             | fmi    |
| <b><u>Patient Demographics and HMA therapy</u></b>                          |                   |                         |        |
| Sex (Male vs. Female)                                                       | 0.1195            | 0.8727 (0.7352, 1.0359) | 0.0363 |
| Age at diagnosis (years)                                                    | 0.7568            | 0.9989 (0.9922, 1.0057) | 0.0893 |
| Age (> 55 vs. ≤ 55)                                                         | 0.285             | 0.8993 (0.7402, 1.0925) | 0.032  |
| <b>HMA Therapy (Decitabine vs. Azacitidine)</b>                             | 0.029             | 1.2167 (1.0204, 1.4509) | 0.1134 |
| A treatment schedule: Decitabine 10-days (Yes vs. No)                       | 0.8101            | 1.0385 (0.7631, 1.4133) | 0.0505 |
| <b><u>Clinical parameters prior to initiation of HMA</u></b>                |                   |                         |        |
| WHO type at diagnosis (4 categories)                                        |                   |                         |        |
| AML with recurrent genetic abnormalities vs.                                |                   |                         |        |
| AML with MDS-related features                                               | 0.4774            | 0.8656 (0.5814, 1.2889) | 0.0075 |
| AML not otherwise specified vs.                                             |                   |                         |        |
| AML with MDS-related features                                               | 0.8075            | 1.025 (0.8403, 1.2503)  | 0.0676 |
| Therapy-related AML vs.                                                     |                   |                         |        |
| AML with MDS-related features                                               | 0.1677            | 1.2674 (0.9051, 1.7749) | 0.0242 |
| Therapy-related AML (Yes vs. No)                                            | 0.1439            | 1.2589 (0.9244, 1.7143) | 0.0249 |
| Treatment related at diagnosis (Yes vs. No)                                 | 0.994             | 0.999 (0.7638, 1.3065)  | 0.1852 |
| Therapy prior to HMA (Relapsed AML vs. Refractory AML)                      | 0.4593            | 1.0659 (0.9001, 1.2621) | 0.0409 |
| Allogenic SCT prior to initiation of HMA (Yes vs. No)                       | 0.9349            | 0.9908 (0.7937, 1.2369) | 0.0771 |
| <b>Duration of CR1 (months)</b>                                             | 0.011             | 0.7368 (0.5824, 0.9322) | 0.1036 |
| <b>Duration of CR1 (&gt; 12 vs. ≤ 12 months)</b>                            | 0.011             | 0.7368 (0.5824, 0.9322) | 0.1036 |
| ECOG status at diagnosis (2 or 3 vs. 0 or 1)                                | 0.3972            | 1.1286 (0.8447, 1.5078) | 0.6437 |
| Number of prior lines of therapy before initiation of HMA                   | 0.0733            | 1.0942 (0.9915, 1.2075) | 0.2302 |
| Number of prior lines of therapy before initiation of HMA (3 categories)    |                   |                         |        |
| <b>2 Prior Lines vs. 1 Prior Line</b>                                       | 0.0299            | 1.2496 (1.0219, 1.528)  | 0.0571 |
| 3 or More Prior Lines vs. 1 Prior Line                                      | 0.4117            | 1.1084 (0.8664, 1.418)  | 0.171  |
| <b><u>Laboratory parameters at initiation of HMA</u></b>                    |                   |                         |        |
| WBC (x 10 <sup>9</sup> cells liter)                                         | 0.1561            | 1.0046 (0.9982, 1.0109) | 0.3279 |
| WBC (x 10 <sup>9</sup> cells per liter) (> 10 vs. ≤ 10)                     | 0.0919            | 1.2227 (0.9673, 1.5456) | 0.2891 |
| <b>Peripheral blast (%)</b>                                                 | 0.0002            | 1.0055 (1.0026, 1.0085) | 0.1259 |
| <b>Peripheral blast (&gt; 5% vs. ≤ 5%)</b>                                  | 0.0003            | 1.4866 (1.2082, 1.8291) | 0.3343 |
| Bone marrow cellularity (%)                                                 | 0.8084            | 0.9995 (0.9954, 1.0036) | 0.589  |
| Bone marrow cellularity (> 20% vs. ≤ 20%)                                   | 0.6121            | 0.9276 (0.6861, 1.2543) | 0.6406 |
| Bone marrow blast (%)                                                       | 0.0836            | 1.0039 (0.9995, 1.0084) | 0.5013 |
| <b>Bone marrow blast (&gt; 20% vs. ≤ 20%)</b>                               | 0.0031            | 1.3278 (1.1004, 1.6021) | 0.0192 |
| Cytogenetic risk group (3 categories)                                       |                   |                         |        |
| Intermediate/Normal vs. Poor                                                | 0.046             | 0.7969 (0.6377, 0.9959) | 0.2512 |
| Good vs. Poor                                                               | 0.0734            | 0.784 (0.6004, 1.0238)  | 0.3162 |
| Complex cytogenetics (Yes vs. No)                                           | 0.1874            | 1.2034 (0.91, 1.5914)   | 0.5274 |
| Chromosome 7 abnormality (Yes vs. No)                                       | 0.6245            | 1.0742 (0.8002, 1.4422) | 0.5383 |
| Chromosome 5 abnormality (Yes vs. No)                                       | 0.1077            | 1.2232 (0.9563, 1.5646) | 0.2876 |
| <b>Platelet Count (x 10<sup>9</sup> cells per liter)</b>                    | 0.0188            | 0.9982 (0.9968, 0.9997) | 0.3002 |
| <b>Platelet Count (x 10<sup>9</sup> cells per liter) (≤ 30 vs. &gt; 30)</b> | 0.0082            | 1.3121 (1.0742, 1.6027) | 0.2831 |
| <b><u>Mutational Status Prior to HMA</u></b>                                |                   |                         |        |
| TP53 mutation (Yes vs. No)                                                  | 0.9042            | 1.0317 (0.6094, 1.7467) | 0.5901 |
| FLT3 mutation (Yes vs. No)                                                  | 0.9371            | 0.9889 (0.7446, 1.3134) | 0.5242 |
| NPM1 mutation (Yes vs. No)                                                  | 0.9537            | 0.993 (0.7783, 1.2669)  | 0.457  |
| CEBPa mutation (Yes vs. No)                                                 | 0.7651            | 0.921 (0.5283, 1.6056)  | 0.5472 |

**Supplemental Table 4: Multivariate Proportional Hazards Model for overall survival.**

| Variable                                                                 | Predictive Factor |                         |        |
|--------------------------------------------------------------------------|-------------------|-------------------------|--------|
|                                                                          | p-value           | HR (95% CI)             | fmi    |
| <b><u>Patient Demographics and HMA therapy</u></b>                       |                   |                         |        |
| Sex (Female vs. Male)                                                    | 0.1761            | 0.881 (0.7331, 1.0586)  | 0.1002 |
| Age (> 55 vs. ≤ 55)                                                      | 0.4811            | 0.9179 (0.7231, 1.1652) | 0.1336 |
| HMA Therapy (Decitabine vs. Azacitidine)                                 | 0.0885            | 1.222 (0.97, 1.5394)    | 0.2121 |
| HMA treatment schedule: Decitabine 10-days (Yes vs. No)                  | 0.464             | 0.8783 (0.6206, 1.2432) | 0.0682 |
| <b><u>Clinical parameters prior to initiation of HMA</u></b>             |                   |                         |        |
| Therapy-related AML (Yes vs. No)                                         | 0.3286            | 1.2026 (0.8303, 1.7418) | 0.1018 |
| Treatment related at diagnosis (Yes vs. No)                              | 0.8667            | 0.974 (0.7159, 1.3253)  | 0.153  |
| Therapy prior to HMA (Relapsed AML vs. Refractory AML)                   | 0.0924            | 1.193 (0.9713, 1.4654)  | 0.1088 |
| Allogeneic HSCT prior to initiation of HMA (Yes vs. No)                  | 0.735             | 0.9548 (0.7302, 1.2487) | 0.1528 |
| Duration of CR1 (> 12 vs. ≤ 12 months)                                   | 0.0747            | 0.7689 (0.5758, 1.0268) | 0.2028 |
| ECOG status at diagnosis (2 or 3 vs. 0 or 1)                             | 0.1407            | 1.2727 (0.9181, 1.7641) | 0.6357 |
| Number of prior lines of therapy before initiation of HMA (3 categories) |                   |                         |        |
| 2 Prior Lines vs. 1 Prior Line                                           | 0.1168            | 1.2206 (0.951, 1.5667)  | 0.2415 |
| 3 or More Prior Lines vs. 1 Prior Line                                   | 0.8015            | 1.0438 (0.7439, 1.4645) | 0.3702 |
| <b><u>Laboratory parameters at initiation of HMA</u></b>                 |                   |                         |        |
| WBC (x 10 <sup>9</sup> cells per liter) (> 10 vs. ≤ 10)                  | 0.5153            | 1.0905 (0.8372, 1.4206) | 0.3757 |
| <b>Peripheral blast (&gt; 5% vs. ≤ 5%)</b>                               | 0.0151            | 1.29 (1.0509, 1.5834)   | 0.2004 |
| Bone marrow cellularity (> 20% vs. ≤ 20%)                                | 0.6424            | 0.9253 (0.6565, 1.3041) | 0.6898 |
| <b>Bone marrow blast (&gt; 20% vs. ≤ 20%)</b>                            | 0.0408            | 1.2441 (1.0092, 1.5337) | 0.0705 |
| Cytogenetic risk group (3 categories)                                    |                   |                         |        |
| Intermediate/Normal vs. Poor                                             | 0.5334            | 0.9212 (0.7102, 1.1949) | 0.2919 |
| Good vs. Poor                                                            | 0.1618            | 0.8172 (0.6151, 1.0856) | 0.2924 |
| Complex cytogenetics (Yes vs. No)                                        | 0.5089            | 1.1151 (0.7988, 1.5568) | 0.5937 |
| Chromosome 7 abnormality (Yes vs. No)                                    | 0.9455            | 1.0113 (0.7259, 1.4088) | 0.5704 |
| Chromosome 5 abnormality (Yes vs. No)                                    | 0.3158            | 1.1651 (0.8605, 1.5775) | 0.4508 |
| Platelet Count (x 10 <sup>9</sup> cells per liter) (≤ 30 vs. > 30)       | 0.0774            | 1.2052 (0.9795, 1.4829) | 0.2427 |
| <b><u>Mutational Status prior to initiation of HMA</u></b>               |                   |                         |        |
| TP53 mutation (Yes vs. No)                                               | 0.9742            | 1.009 (0.5732, 1.7762)  | 0.6143 |
| FLT3 mutation (Yes vs. No)                                               | 0.7585            | 0.9541 (0.7004, 1.2996) | 0.5614 |
| NPM1 mutation (Yes vs. No)                                               | 0.986             | 1.0021 (0.7882, 1.274)  | 0.3914 |
| CEBPa mutation (Yes vs. No)                                              | 0.7369            | 0.905 (0.496, 1.6515)   | 0.5822 |

**Supplemental Table 5: Response rates and OS based on HMA administration schedules**

| Characteristic                       | Number of responders | % of Responders | Median OS (95% CI) |
|--------------------------------------|----------------------|-----------------|--------------------|
| HMA Administration Schedule (n= 587) |                      |                 |                    |
| Azacitidine (n=336):                 |                      |                 |                    |
| 7-0 (n=257)                          | 34                   | 13.3            | 6.7 (5.8 – 8.7)    |
| 5-2-2 (n=18)                         | 4                    | 25.0            | 11.1 (5.7 – Inf)   |
| 5-0 (n=60)                           | 11                   | 19.0            | 8.4 (5.7 – 10.6)   |
| 10-0 (n=1)                           | 0                    | 0.0             | NA (NA)            |
| Decitabine (n=251):                  |                      |                 |                    |
| 7-0 (n=3)                            | 0                    | 0.0             | 12.7 (NA)          |
| 5-2-2 (n=2)                          | 1                    | 50.0            | 18.0 (NA)          |
| 5-0 (n=181)                          | 28                   | 16.1            | 6.0 (4.8 – 7.7)    |
| 10-0 (n=50)                          | 14                   | 28.0            | 8.0 (6.4 – 16.3)   |
| Others (n=15)                        | 1                    | 6.7             | 2.4 (0.7 – 7.3)    |

## Supplemental Figure 1: Probability of overall survival (OS) of RR-AML patients treated with HMAs

- (A) From onset of HMA treatment in the global cohort censored at time of alloSCT
- (B) From onset of HMA treatment according to AML IWG response criteria (for CR/CRi/PD) and MDS IWG response criteria (SD/Hi) censored at time of alloSCT
- (C) From onset of HMA treatment according to treatment schedule used (decitabine 10 days vs all others)
- (D) From onset of HMA treatment according to mutational status (TP53 non mutated vs. mutated)
- (E) From onset of HMA treatment according to mutational status (FLT3 non mutated vs. mutated)

(A)

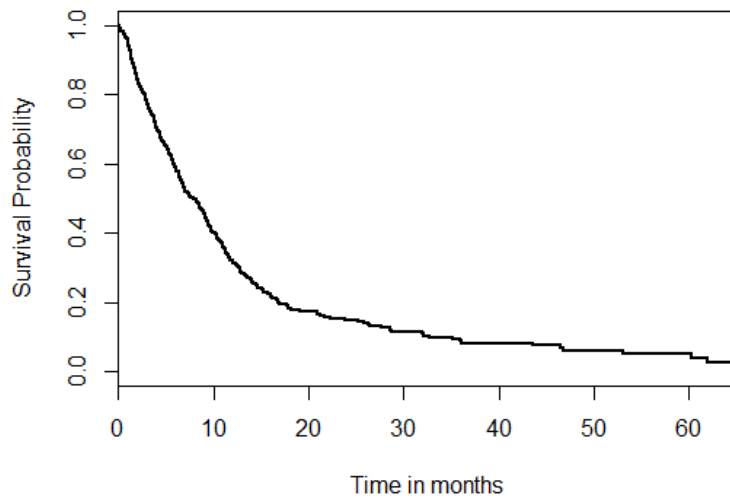

(B)

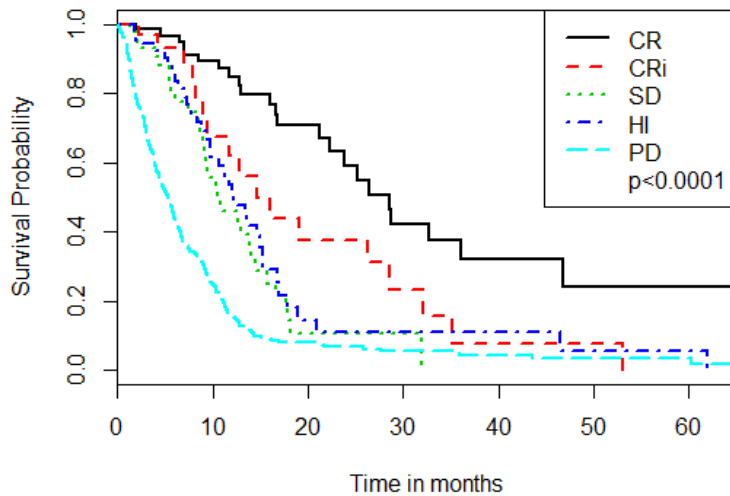



(C)

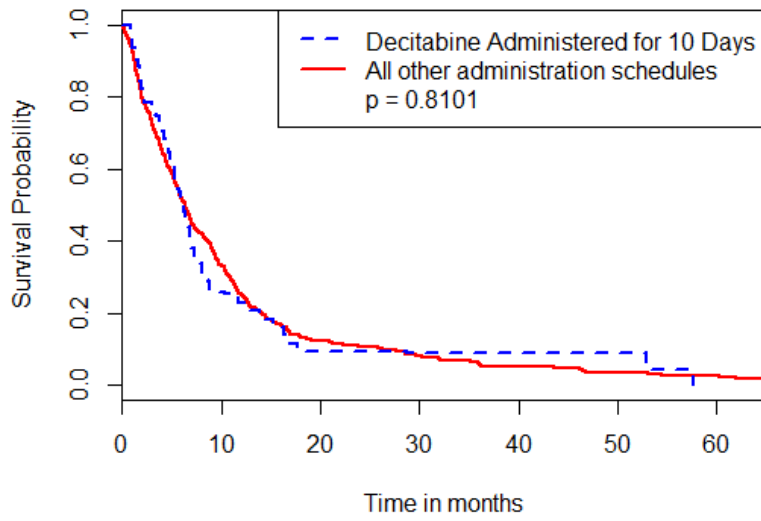

(D)

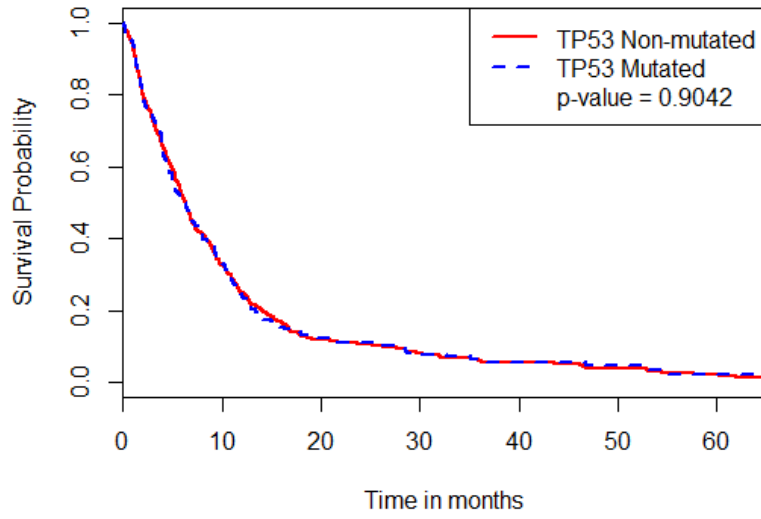

(E)

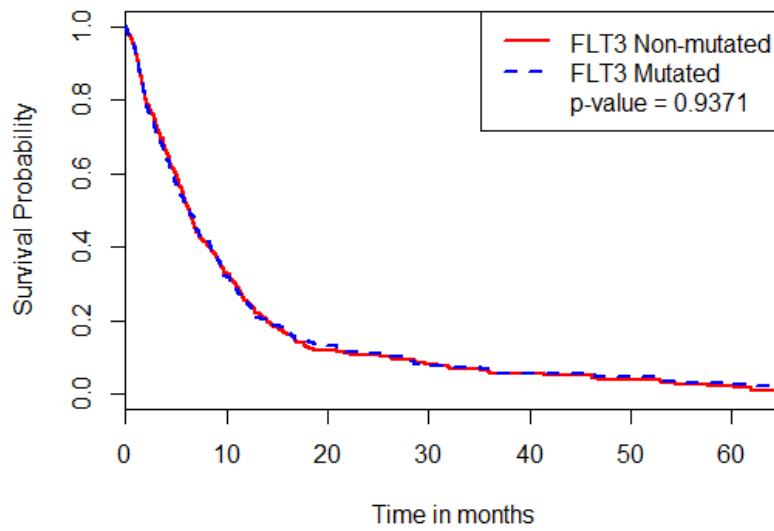

Supplement: ba016121-suppl1.pdf [file ba016121-suppl1.pdf]
